# Supplementary material for: An Apoplastic Defensin of Wheat Elicits the Production of Extracellular Polysaccharides in Snow Mold
Source: MDPI journal article supplement (doi:10.3390/plants10081607), 2021-08-05
Supplement: s1 [file s1]

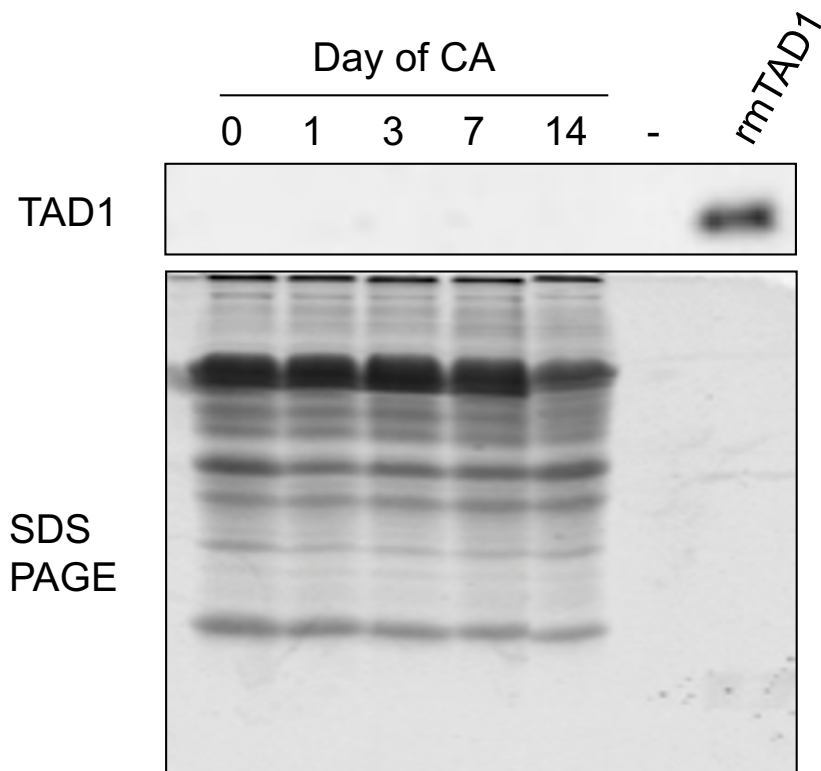

**Figure S1.** Western blot analysis of cold-acclimated wheat total protein extracts. Total proteins from a time-course of cold treatment were separated by SDS-PAGE and a duplicated gel was transferred to a membrane for Western blot analysis. Recombinant mature TAD1 (rmTAD1) was used as positive control for analysis. CA, cold acclimation.
